# Supplementary material
Source: publisher site journal article supplement (https://static.cambridge.org/content/id/urn:cambridge.org:id:article:S1041610218001679/resource/name/S1041610218001679supp003.docx)
Supplement: Supplementary file 1 [file S1041610218001679supp003.docx]

Database: PsycINFO (1806 to 2018)

Search strategy:

| 1. exp Dementia/ |  |
| --- | --- |
| 2. "dementi*".m_titl. |  |
| 3. "Alzheimer*".m_titl. |  |
| 4. 1 or 2 or 3 |  |
| 5. neuropsych*.mp. |  |
| 6. behav*.mp. |  |
| 7. agitat*.mp. |  |
| 8. aggres*.mp. |  |
| 9. nursing home.mp. |  |
| 10. exp Behavior Problems/ |  |
| 11. exp Agitation/ |  |
| 12. 5 or 6 or 7 or 8 or 10 or 11 |  |
| 13. exp Nursing Homes/ |  |
| 14. 9 or 13 |  |
| 15. 4 and 12 and 14 |  |
| 16. limit 15 to ("therapy (maximizes sensitivity)" and yr="1998 -Current") |  |
| 17. limit 16 to (journal article and english) |  |

Database: Embase Classic+Embase (1947 to 2018)

Search strategy:

| 1. dementia/ |  |
| --- | --- |
| 2. "Alzheimer*".m_titl. |  |
| 3. dementia.m_titl. |  |
| 4. 1 or 2 or 3 |  |
| 5. agitation/ |  |
| 6. neuropsych*.mp. |  |
| 7. agitat*.mp. |  |
| 8. behav*.mp. |  |
| 9. exp behavior/ |  |
| 10. aggres*.mp. |  |
| 11. 5 or 6 or 7 or 8 or 9 or 10 |  |
| 12. 4 and 11 |  |
| 13. limit 12 to "therapy (maximizes sensitivity)" |  |
| 14. limit 13 to english |  |
| 15. nursing home/ |  |
| 16. 14 and 15 |  |
| 17. limit 16 to journal |  |
| 18. limit 17 to yr="1998 -Current" |  |

Database: Ovid MEDLINE(R) ALL (1946 to 2018)

Search strategy:

| 1. exp Dementia/ |  |
| --- | --- |
| 2. "dementi*".m_titl. |  |
| 3. "Alzheimer*".m_titl. |  |
| 4. 1 or 2 or 3 |  |
| 5. neuropsych*.mp. |  |
| 6. behav*.mp. |  |
| 7. agitat*.mp. |  |
| 8. aggres*.mp. |  |
| 9. exp Behavioral Symptoms/ |  |
| 10. exp Psychomotor Agitation/ |  |
| 11. 5 or 6 or 7 or 8 or 9 or 10 |  |
| 12. Nursing Care/ |  |
| 13. nursing home.mp. |  |
| 14. 12 or 13 |  |
| 15. 4 and 11 and 14 |  |
| 16. limit 15 to (yr="1998 -Current" and "therapy (maximizes sensitivity)") |  |
